# Supplementary material
Source: PubMed Central journal article supplement (PMC2639190)
Supplement: bhn033_1.pdf [file bhn033_1.pdf]

## Supplementary Figure legends

**Supplementary Figure 1** Distribution of coefficient of variation (CV) values (log transformed) for the present sample of prefrontal cortex cells. Dark gray, future- and previous-goal cells; light gray, remaining cells. Means  $\pm$  S.D. for Monkey 1 were  $112.6 \pm 91.6$  ( $n=123$ ) for future- and previous-goal cells and  $147.1 \pm 138.8$  ( $n=619$ ) for the other cells. For Monkey 2, means were  $117.3 \pm 104.2$  ( $n=650$ ) and  $87.4 \pm 46.1$  ( $n=49$ ), respectively. Mean CV values of two groups of cells differed significantly (Mann-Whitney U-test,  $\alpha=0.05$ , two-tailed) in both monkeys (Monkey 1,  $n=123$ ,  $m=619$ ,  $U=37174.0$ ,  $p=0.001$ ; Monkey 2,  $n=49$ ,  $m=650$ ,  $U=13447.5$ ,  $p=0.04$ ). Arrows mark three outlier cells that were designated for elimination due to high trial-to-trial variability (see Methods).

**Supplementary Figure 2** JPETHs using smaller bins. **(A)** The data presented in Figure 3A, with smaller (20 ms) bins. The time axis of the coincidence histogram and the traditional cross correlogram (upper, right) also have a bin width of 20 ms. **(B)** The data in Figure 5A with 20-ms bins.

**Supplementary Figure 3** Removal of temporal variation in the delay period. The data in Figure 3A, without 1.0 and 1.5 s delays between cue onset and cue offset (the trigger signal). **(A)** JPETH constructed from 83 trials with a total of 12,731 spikes. Format as in Figure 3A. **(B)** Trial-by-trial activity for the histograms shown on JPETH's axes in **A**. Format as in Figure 3B. **(C)** Coincidence histograms. The red line shows the data without the shorter delay periods, equivalent to the coincidence histogram shown in **A**, and the gray line shows the data including all trials, from Figure 3C.

**Supplementary Figure 4** Cross-correlations on different time scales. **(A)** Cross-correlogram on the millisecond order for the F-P pair illustrated in Figures 3 and 4 (bin width, 1 ms). **(B)** Cross-correlogram for the F-F pair illustrated in Figure 5, on the time scale of **A**. **(C)** Population cross-correlograms for neuron pairs with significant, positive correlations ( $n=11$  for F-P pairs,  $n=10$  for F-F pairs), also on the time scale of **A**. Background shading shows S.E.M. Neither the individual pairs (**A**, **B**) nor the populations (**C**) show sharp (narrow peaked) synchrony. **(D)** Population cross-correlogram for the population and in the format of **C**, except

on the time scale used in Figures 3–5 (bin width, 75 ms, smoothed by a 3-bin moving average). Both populations show broad peaks in the traditional cross correlations, on the order of hundreds of milliseconds.

**Supplementary Figure 5** JPETHs on trials with saccades less than 4°. **(A)** The data presented in Figure 3A, without any large-saccade trials. **(B)** The data in Figure 5A without large-saccade trials.

**Supplementary Figure 6** Basis for classifying the future-goal cell used for the abscissa of Figures 3–5. Cells with goal selectivity during the fixation period of second-chance trials (see Figure 1B) but not during the fixation period of current trials were classed as future-goal cells (Genovesio et al. 2006). **(A)** Second-chance trials sorted according to the future goal. Each raster and histogram shows activity on second-chance trials, aligned on cue onset. Note that this neuron showed future-goal selectivity during the fixation period (shading, ANOVA,  $\alpha=0.05$ ,  $n=61$ ,  $F_{2,58} = 69.08$ ,  $p < 0.0001$ ), with a preference for the left future goal. Abbreviation: sp, spikes. **(B)** The same cell showed no significant goal selectivity for previous goals ( $n=143$ ,  $F_{2,140} = 0.52$ ,  $p=0.60$ ).

**Supplementary Figure 7** Basis for classifying the previous-goal cell used for the ordinate of Figures 3 and 4. Format as in Supplementary Figure 6. **(A)** This neuron represented the previous goal during the fixation period of the current trials (shading, ANOVA,  $\alpha=0.05$ ,  $n=143$ ,  $F_{2,140} = 14.09$ ,  $p < 0.0001$ ), with a preference for the top goal. **(B)** The same cell showed no significant goal selectivity ( $n=61$ ,  $F_{2,58} = 0.02$ ,  $p=0.98$ ) for future goals in second-chance trials (see Figure 1B).

**Supplementary Figure 8** Basis for classifying the future-goal cell used for the ordinate of Figure 5, in the format of Supplementary Figure 6. **(A)** This neuron represented the future goal during the fixation period of the second-chance trials (shading, ANOVA,  $\alpha=0.05$ ,  $n=61$ ,  $F_{2,58} = 53.24$ ,  $p < 0.0001$ ), with a preference for the left goal. **(B)** The same cell showed no significant goal selectivity for previous goals ( $n=143$ ,  $F_{2,140} = 2.90$ ,  $p=0.06$ ).

**Supplementary Figure 9** Population coincidence histograms, from different populations and analytical methods. **(A)** As in Figure 7C, but excluding pairs recorded from the same electrode (leaving  $n=9$  F–P pairs and  $n=8$  F–F pairs). **(B)** As in Figure 7C, but selecting components of the population based on the number of significant bins, rather than Bonferroni correction ( $n=16$  F–P pairs,  $n=12$  F–F pairs).

**Supplementary Figure 10** Population analysis excluding second-chance trials. **(A)** Population JPETH of F–P pairs, as in Fig. 7A, except for the exclusion of second-chance trials from the average. **(B)** Population JPETH of F–F pairs, as in Fig. 7B. **(C)** Population coincidence histograms for **A** and **B** in the format of Fig. 7C.
