# Supplementary material
Source: PubMed Central journal article supplement (PMC2639190)
Supplement: bhn033_2.pdf [file bhn033_2.pdf]

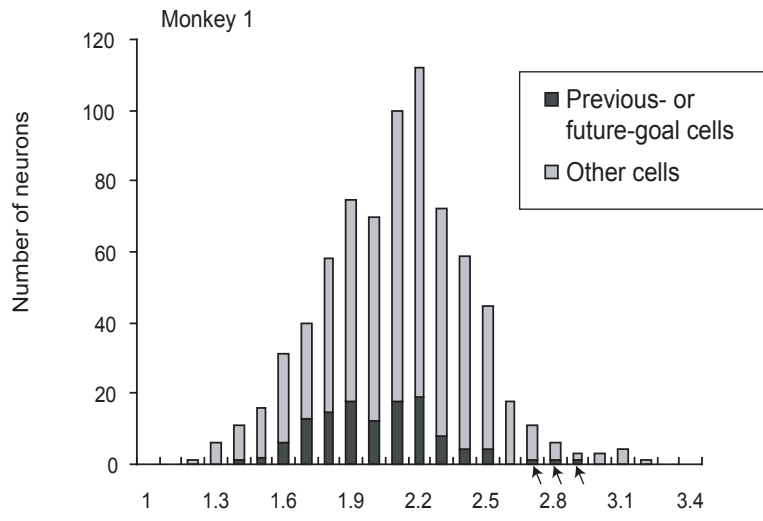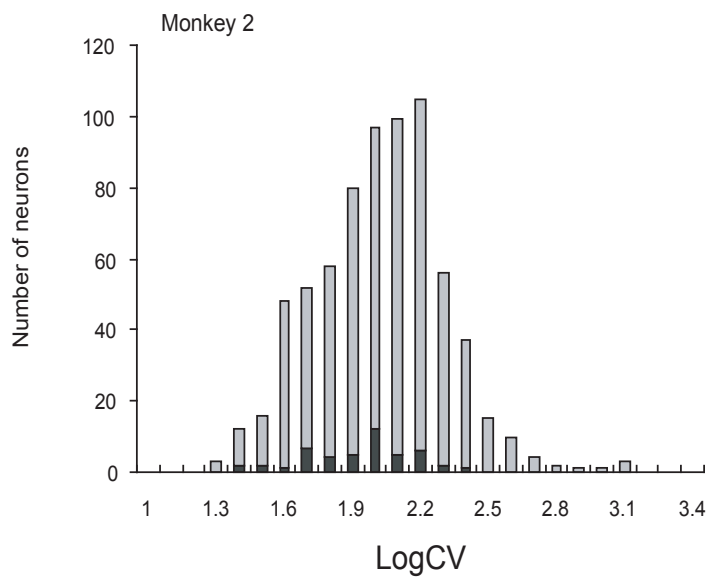

Supplemental figure 1

**A**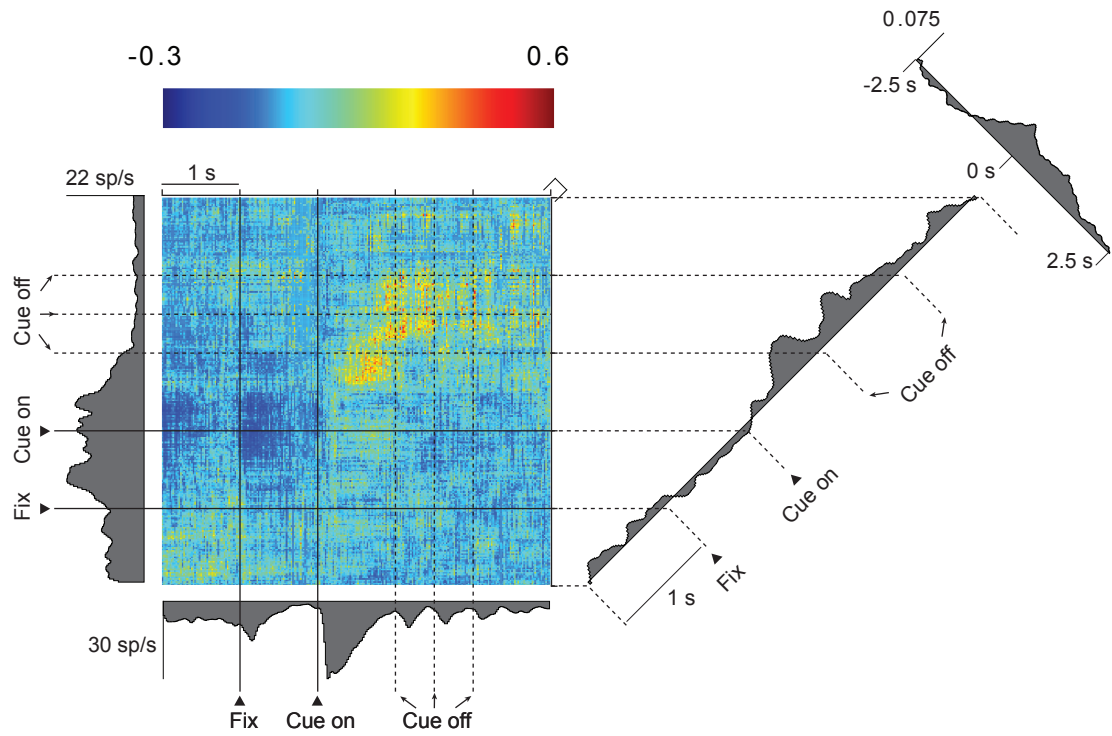**B**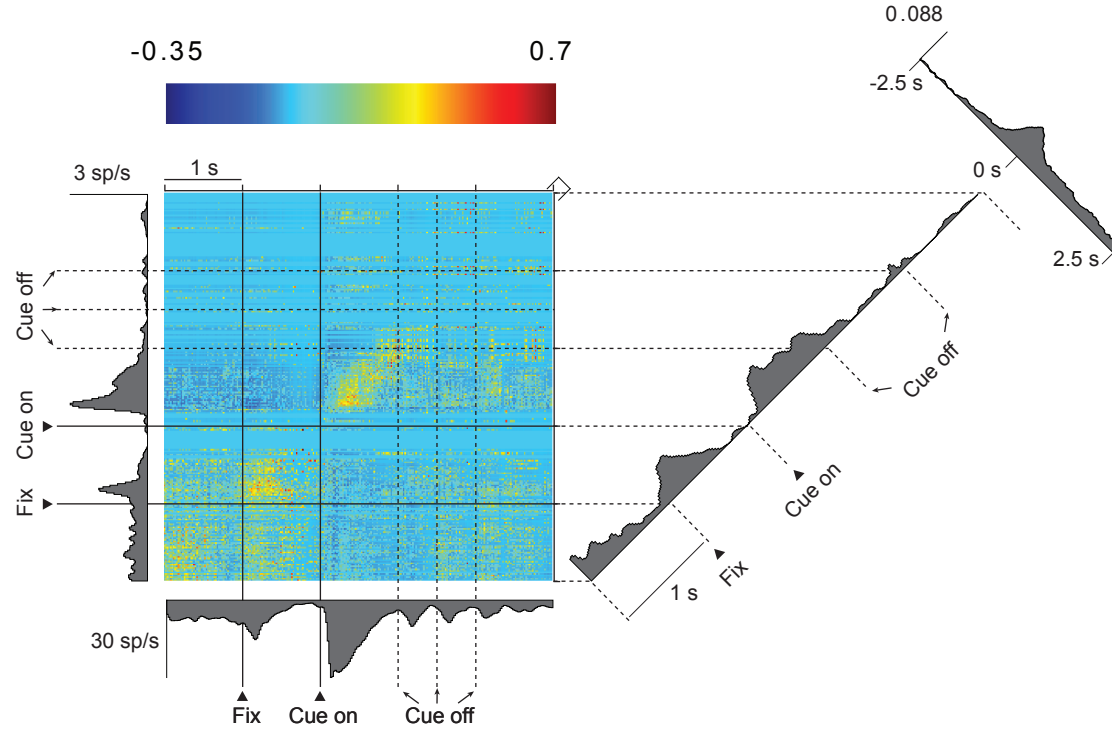

Supplemental figure 2

# Long cue (2 s) only

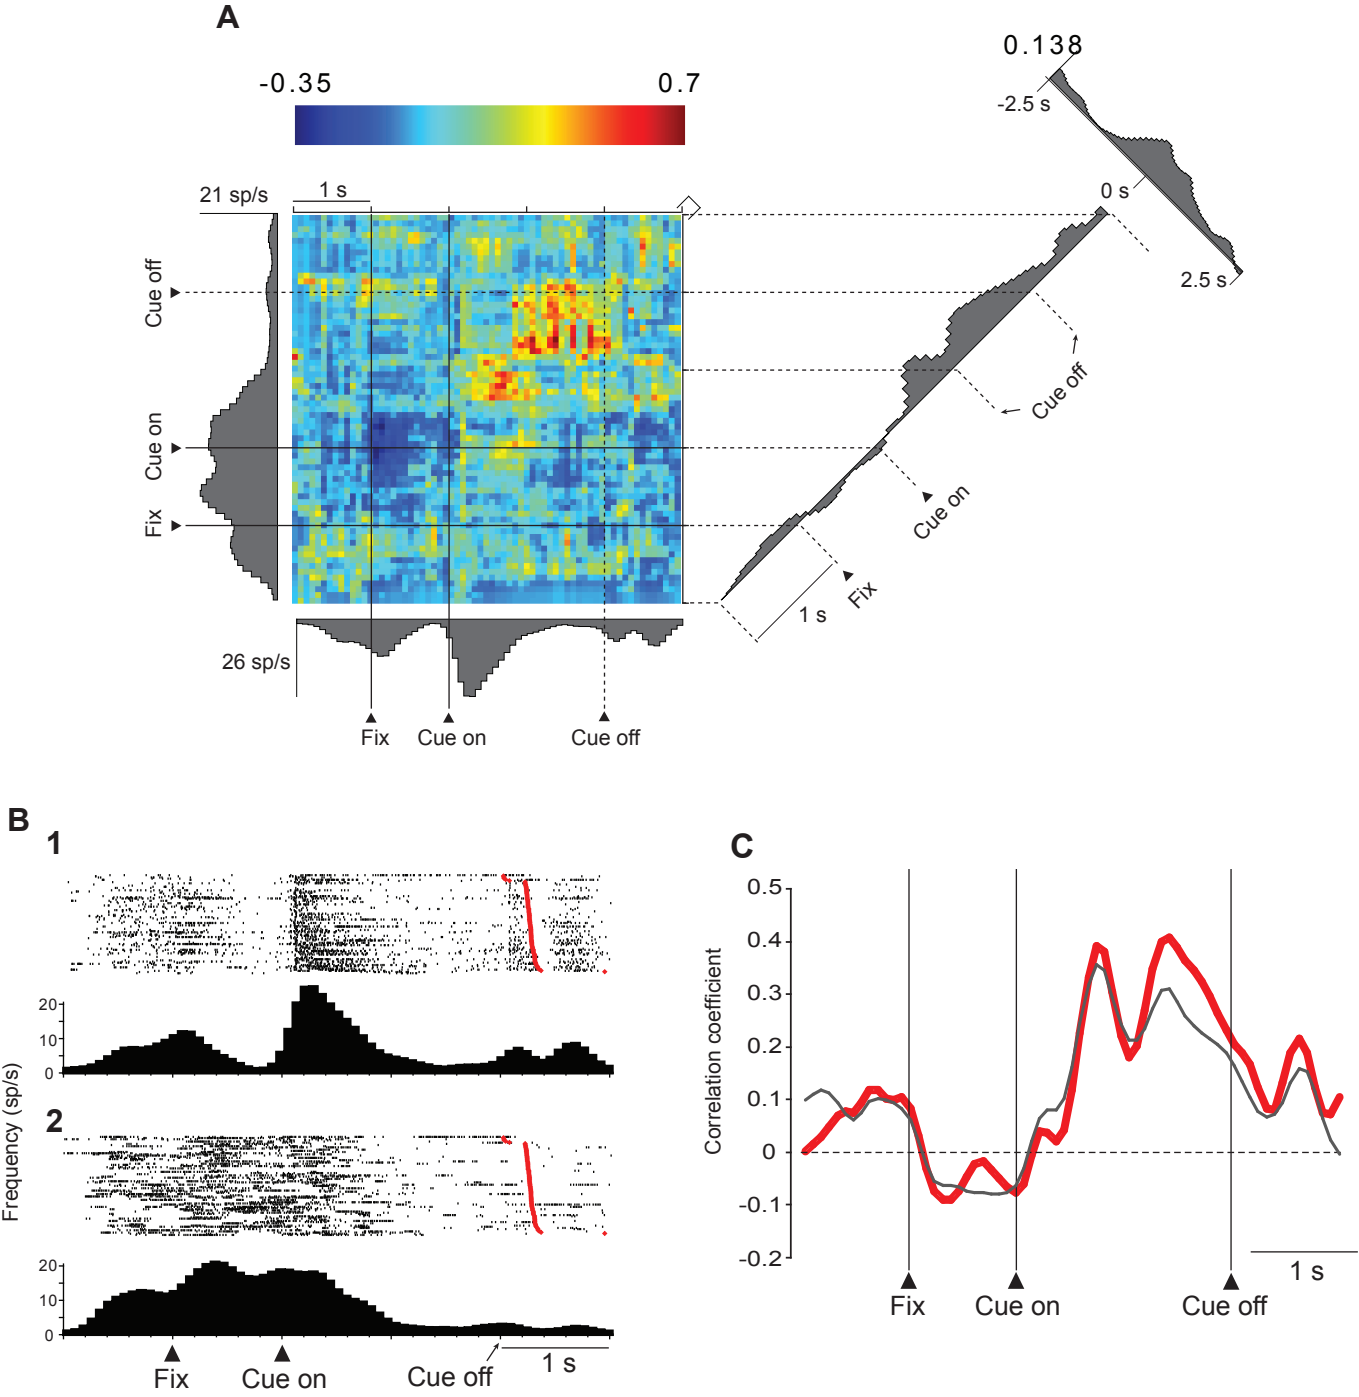

Supplemental figure 3

**A**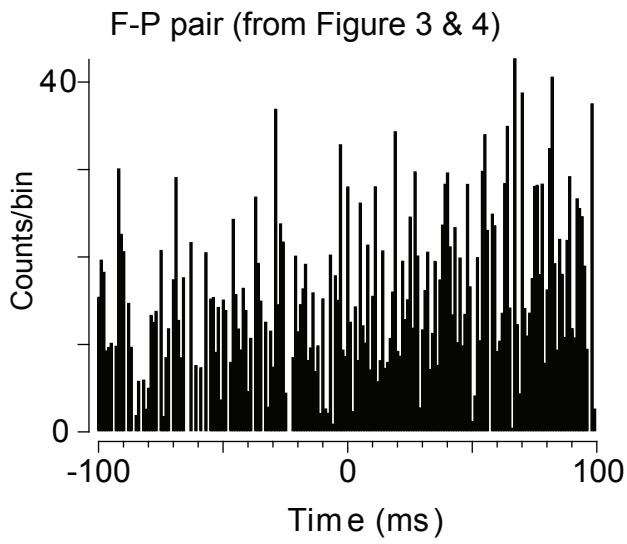**B**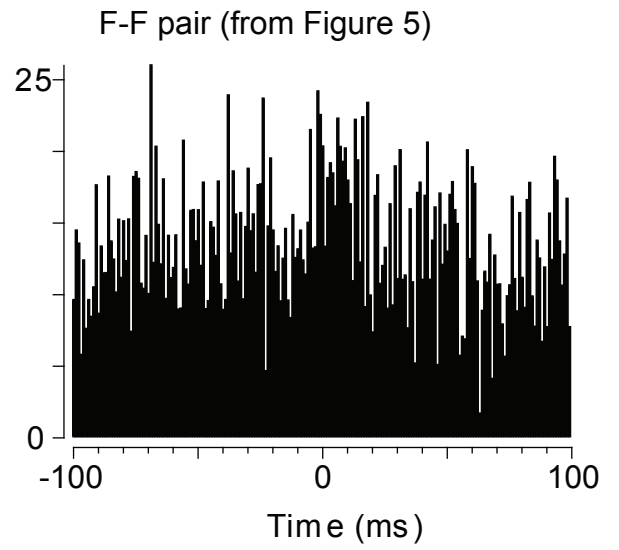**C**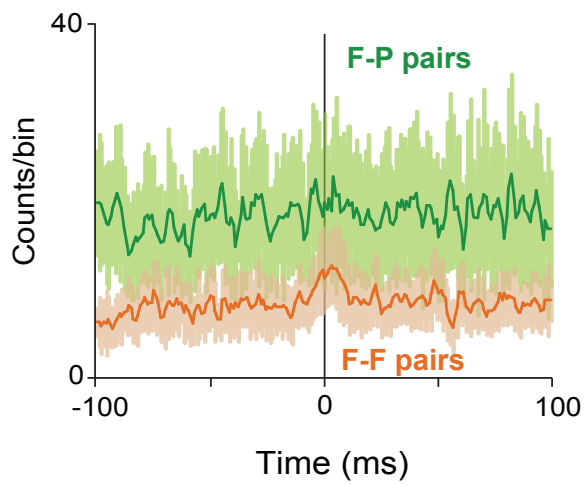**D**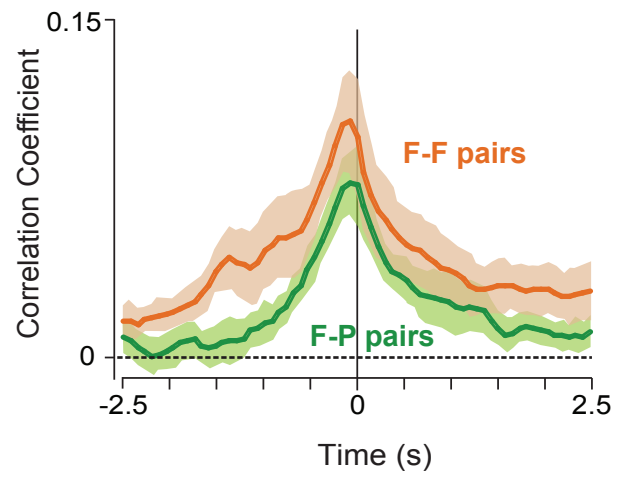

Supplemental figure 4



F-P pair (Fig. 3 plot)

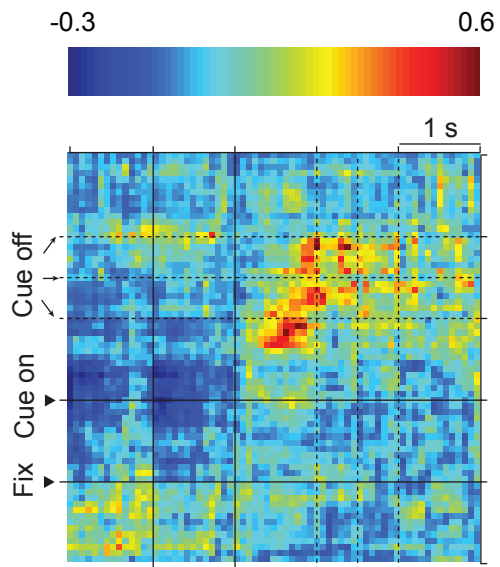

F-F pair (Fig. 5 plot)

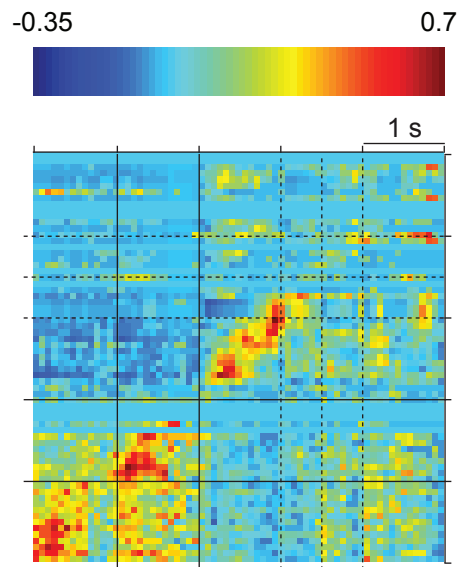

Supplemental figure 5

# Future-goal cell

A

Second-chance trials  
sorted by future goal

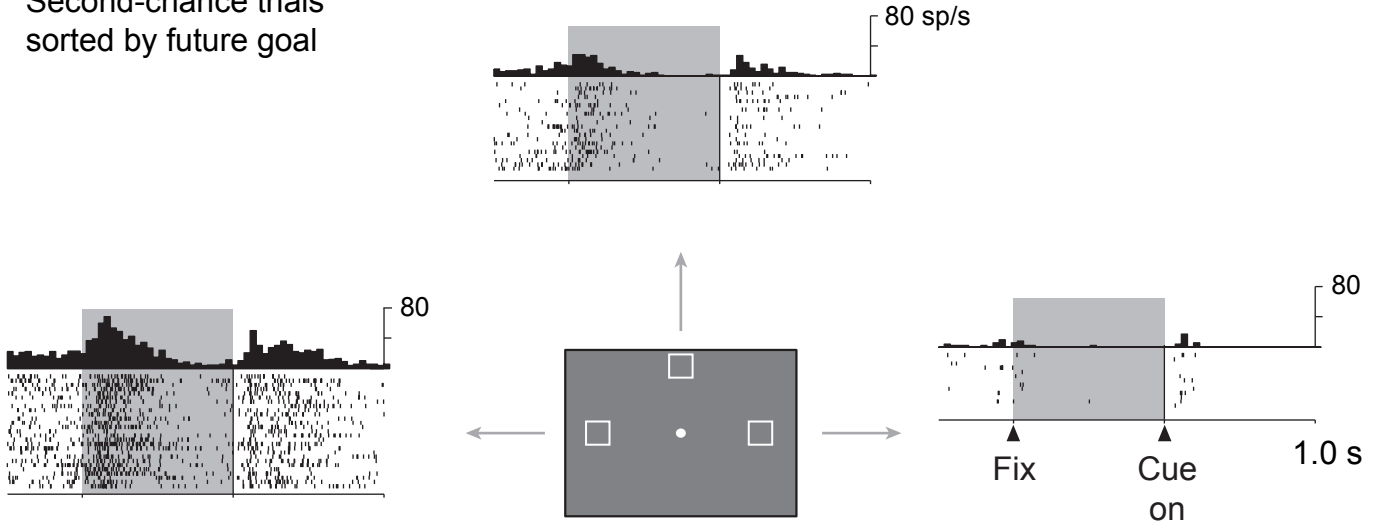

A

Current trials  
sorted by previous goal

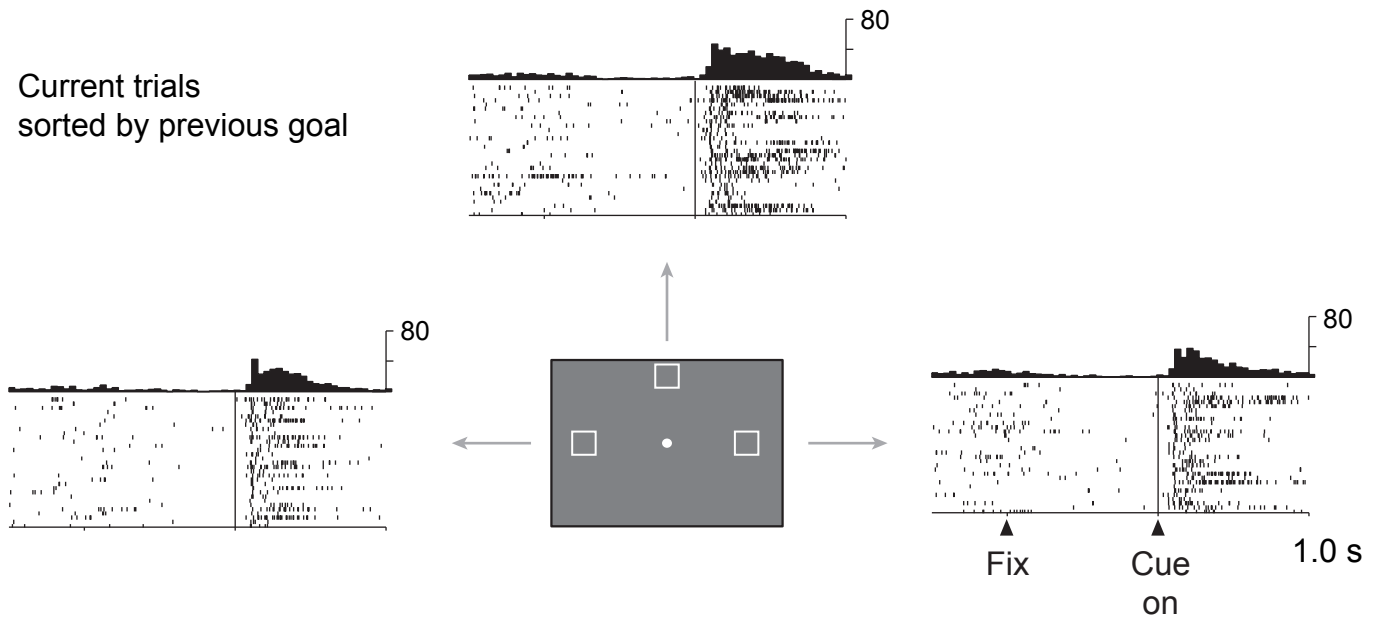

# Previous-goal cell

A

Current trials  
sorted by previous goal

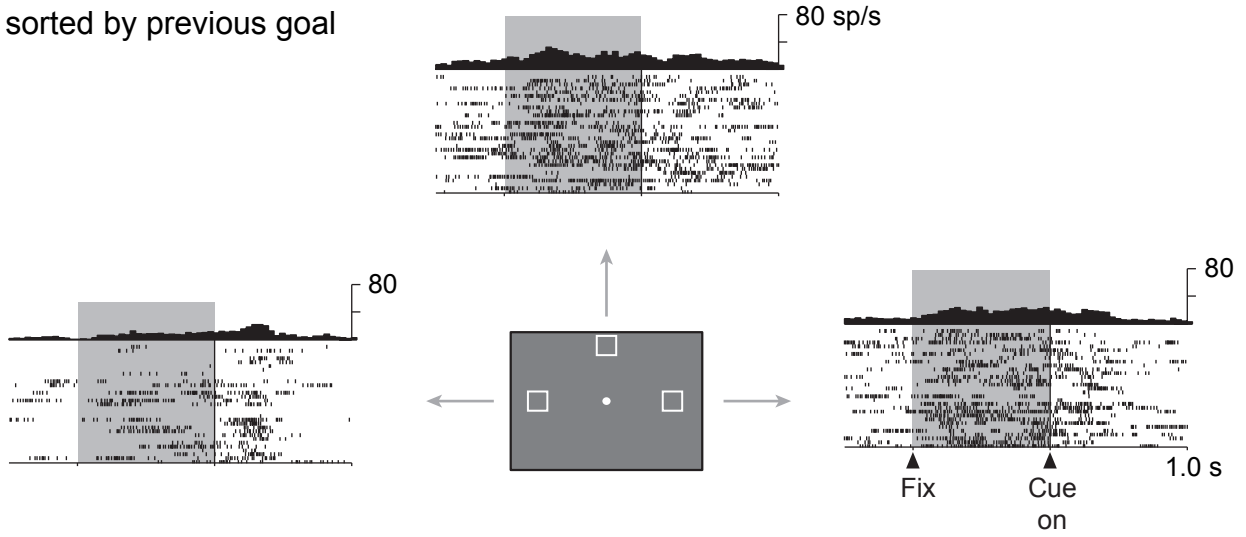

B

Second-chance trials  
sorted by future goal

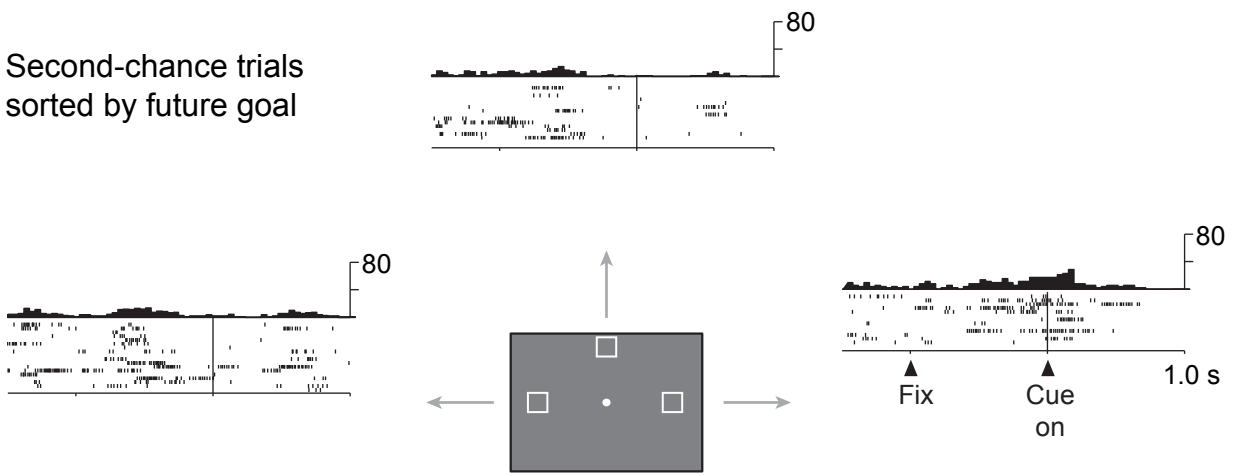

Supplemental figure 7

# Future-goal cell

**A**

Second-chance trials  
sorted by future goal

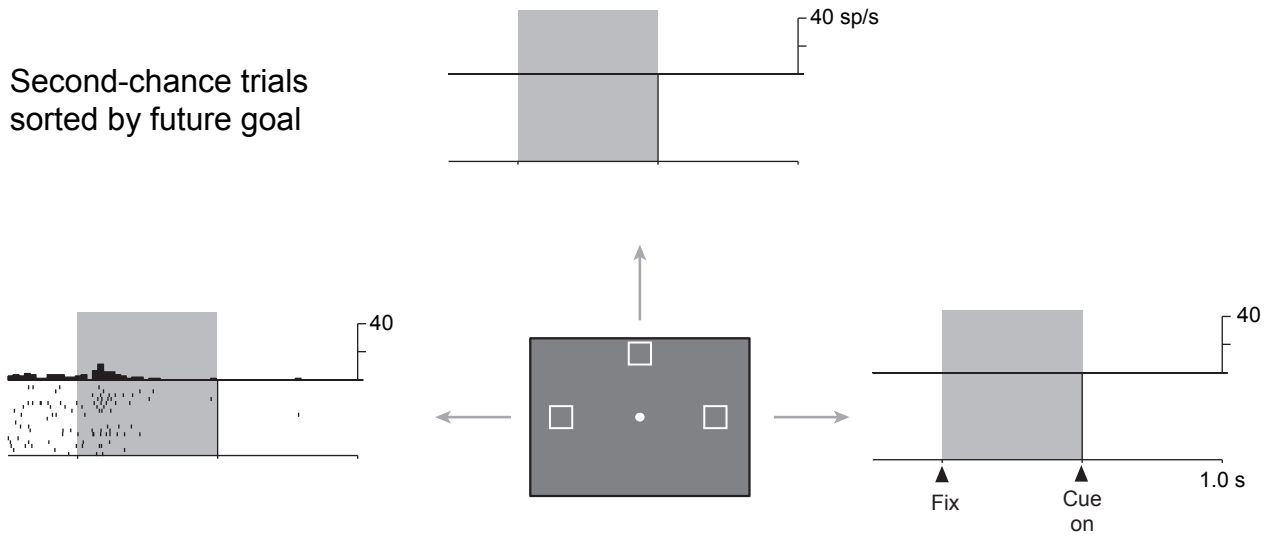

**B**

Current trials  
sorted by previous goal

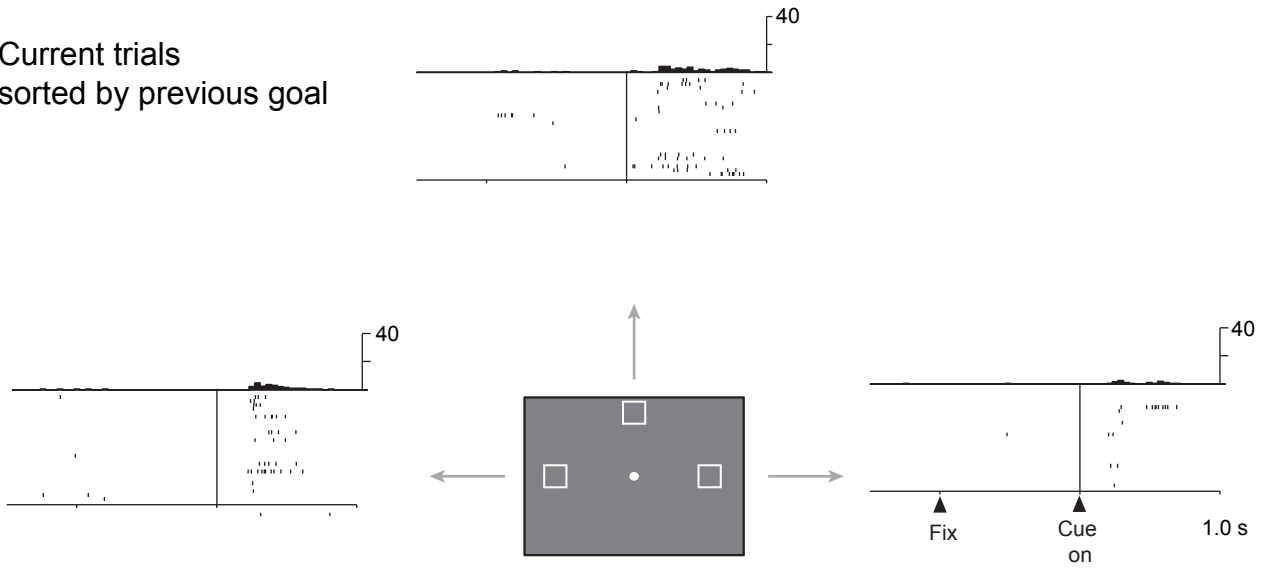

Supplemental figure 8

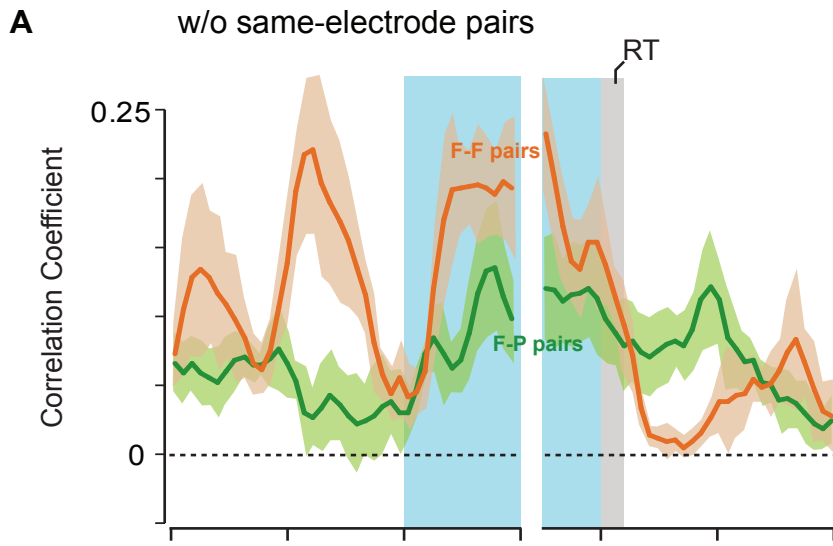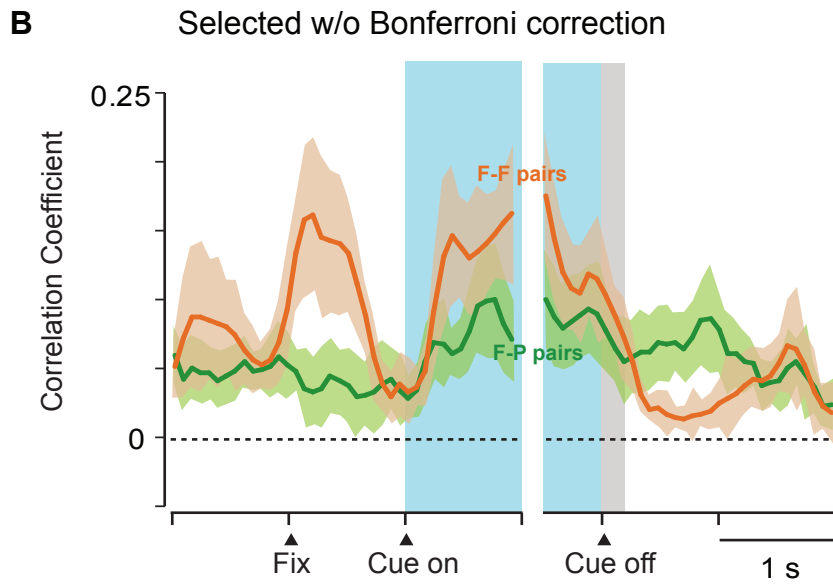

Supplemental figure 9

Current trials only  
w/o second-chance trials

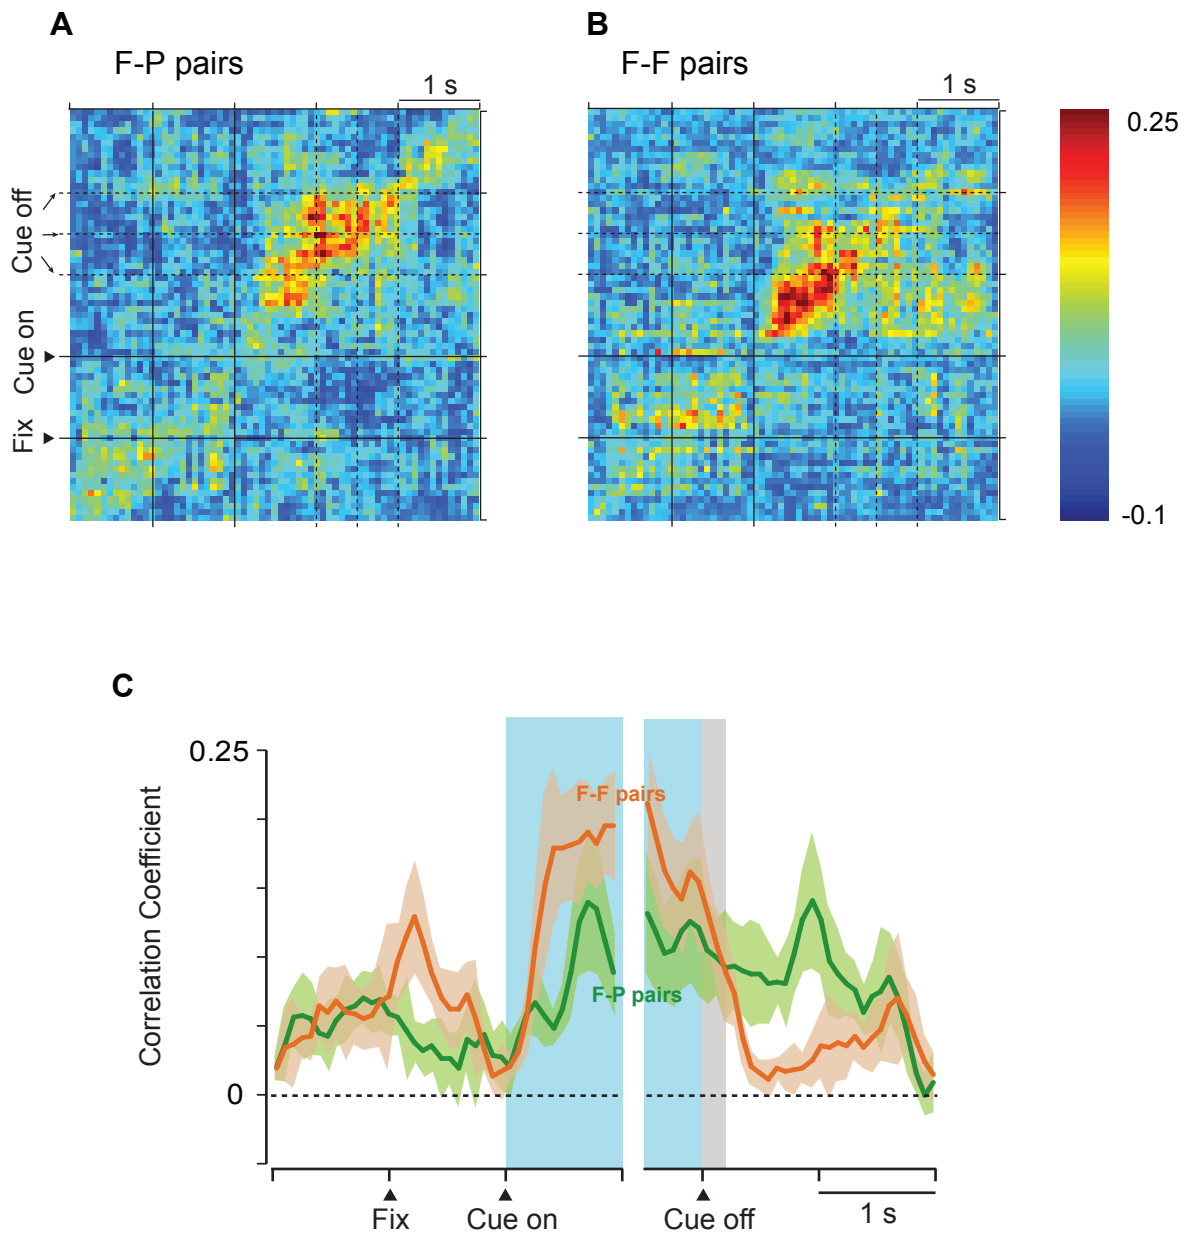

Supplemental figure 10
